# Supplementary material for: Aptardi predicts polyadenylation sites in sample-specific transcriptomes using high-throughput RNA sequencing and DNA sequence
Source: PubMed Central journal article supplement (PMC7955126; doi:10.1038/s41467-021-21894-x), 2021-03-12
Supplement: 41467_2021_21894_MOESM3_ESM.pdf [file 41467_2021_21894_MOESM3_ESM.pdf]

## **Description of Additional Supplementary Files**

File Name: Supplementary Data 1

Description: Transcripts that could be associated with an Ensembl gene symbol and were not differentially expressed (p-value  $\leq 0.001$ ) in the original transcriptome but differentially expressed in the aptardi modified transcriptome.
